# Supplementary material for: Strain engineering of optical properties in transparent VO2/muscovite heterostructures
Source: Royal Society of Chemistry journal article supplement (doi:10.1039/d1cp00642h), 2021-01-01
Supplement: d1cp00642h1.pdf [file d1cp00642h1.pdf]

## Strain engineering of optical properties in transparent VO<sub>2</sub>/muscovite heterostructures

Hsiao-Wen Chen<sup>1</sup>, Chien-I Li<sup>2</sup>, Chun-Hao Ma<sup>2</sup>, Ying-Hao Chu<sup>2</sup>, and Hsiang-Lin Liu<sup>1\*</sup>

<sup>1</sup>Department of Physics, National Taiwan Normal University, Taipei 11677, Taiwan

<sup>2</sup>Department of Materials Science Engineering, National Chiao Tung University,  
Hsinchu 30010, Taiwan.

\*Corresponding author: hliu@ntnu.edu.tw

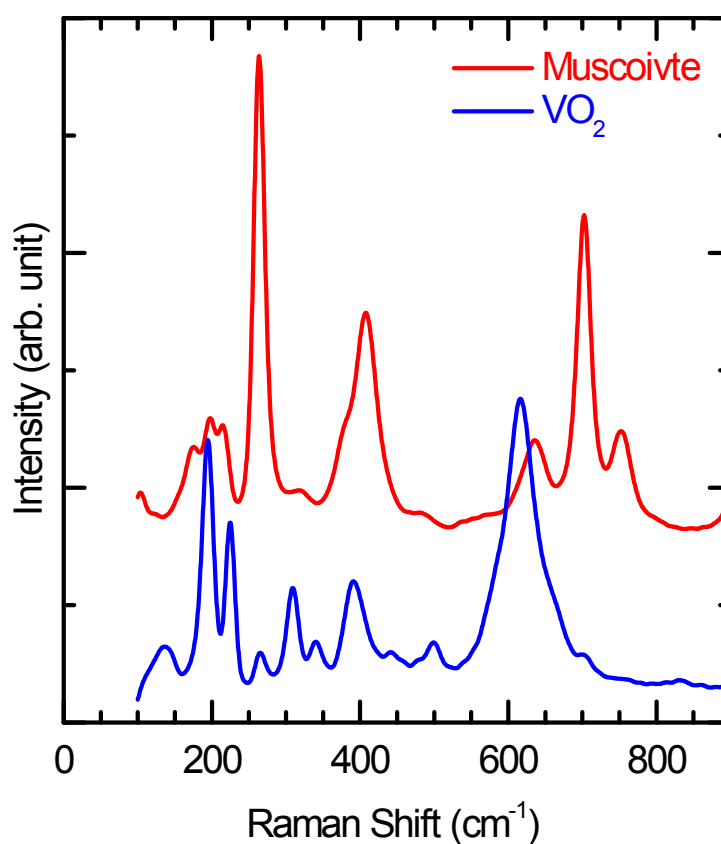

Figure S1 Unpolarized room-temperature Raman scattering spectra of VO<sub>2</sub>/muscovite heterostructures and pure muscovite substrate.

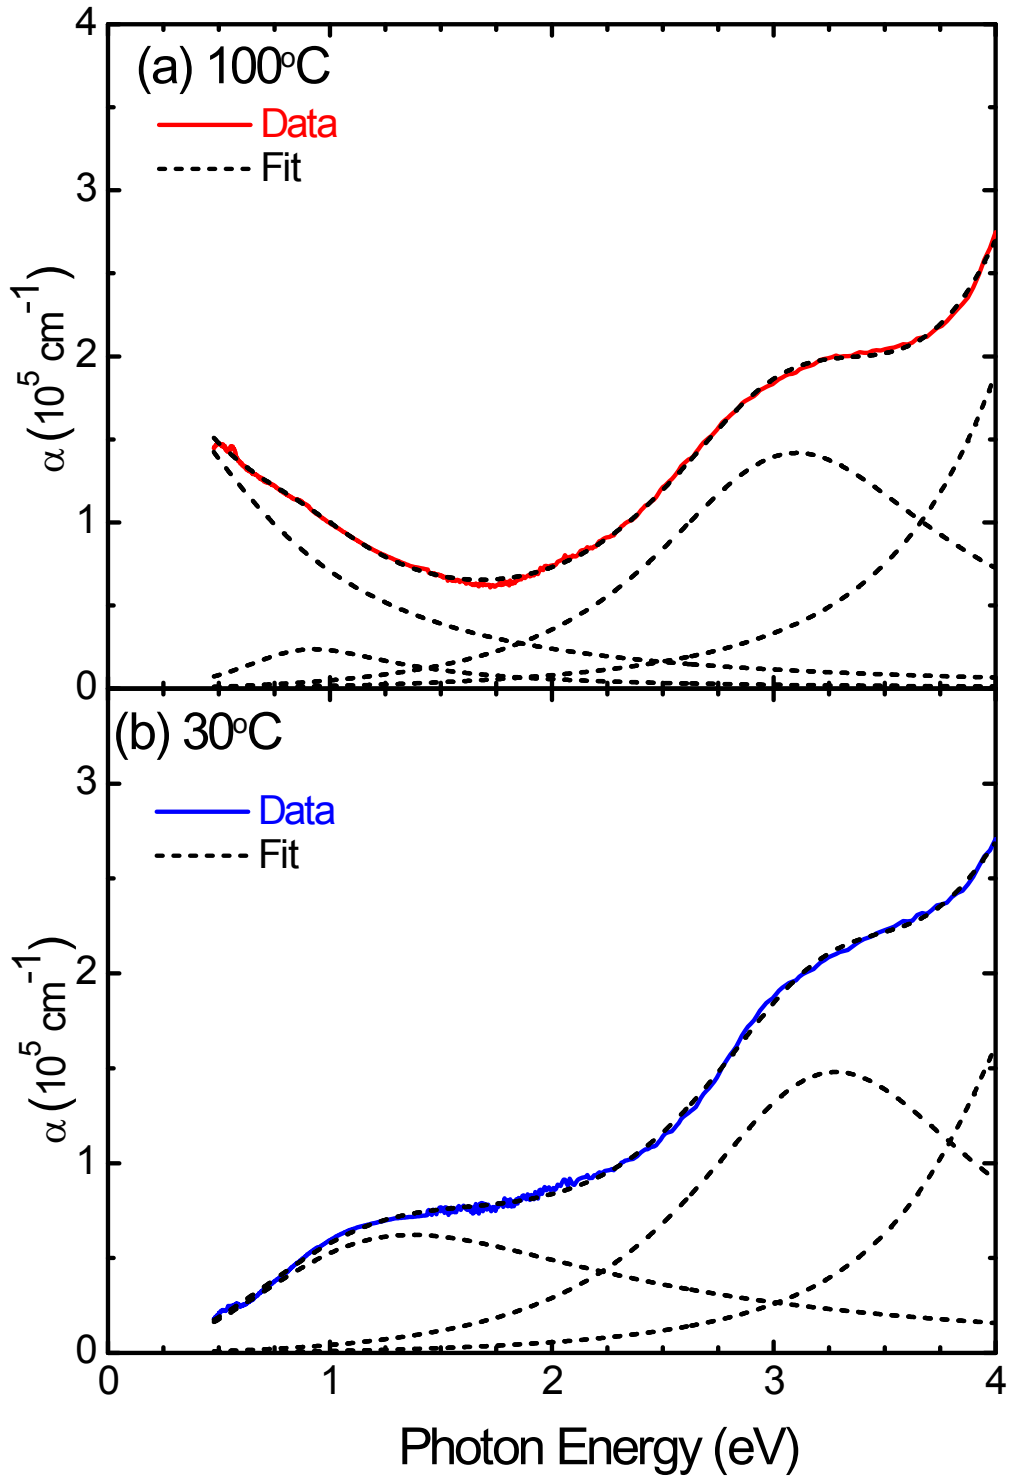

Figure S2 Optical absorption spectra of VO<sub>2</sub> at (a) 100°C and (b) 30°C. The dashed lines illustrate the best fit using the Drude and Lorentzian functions.

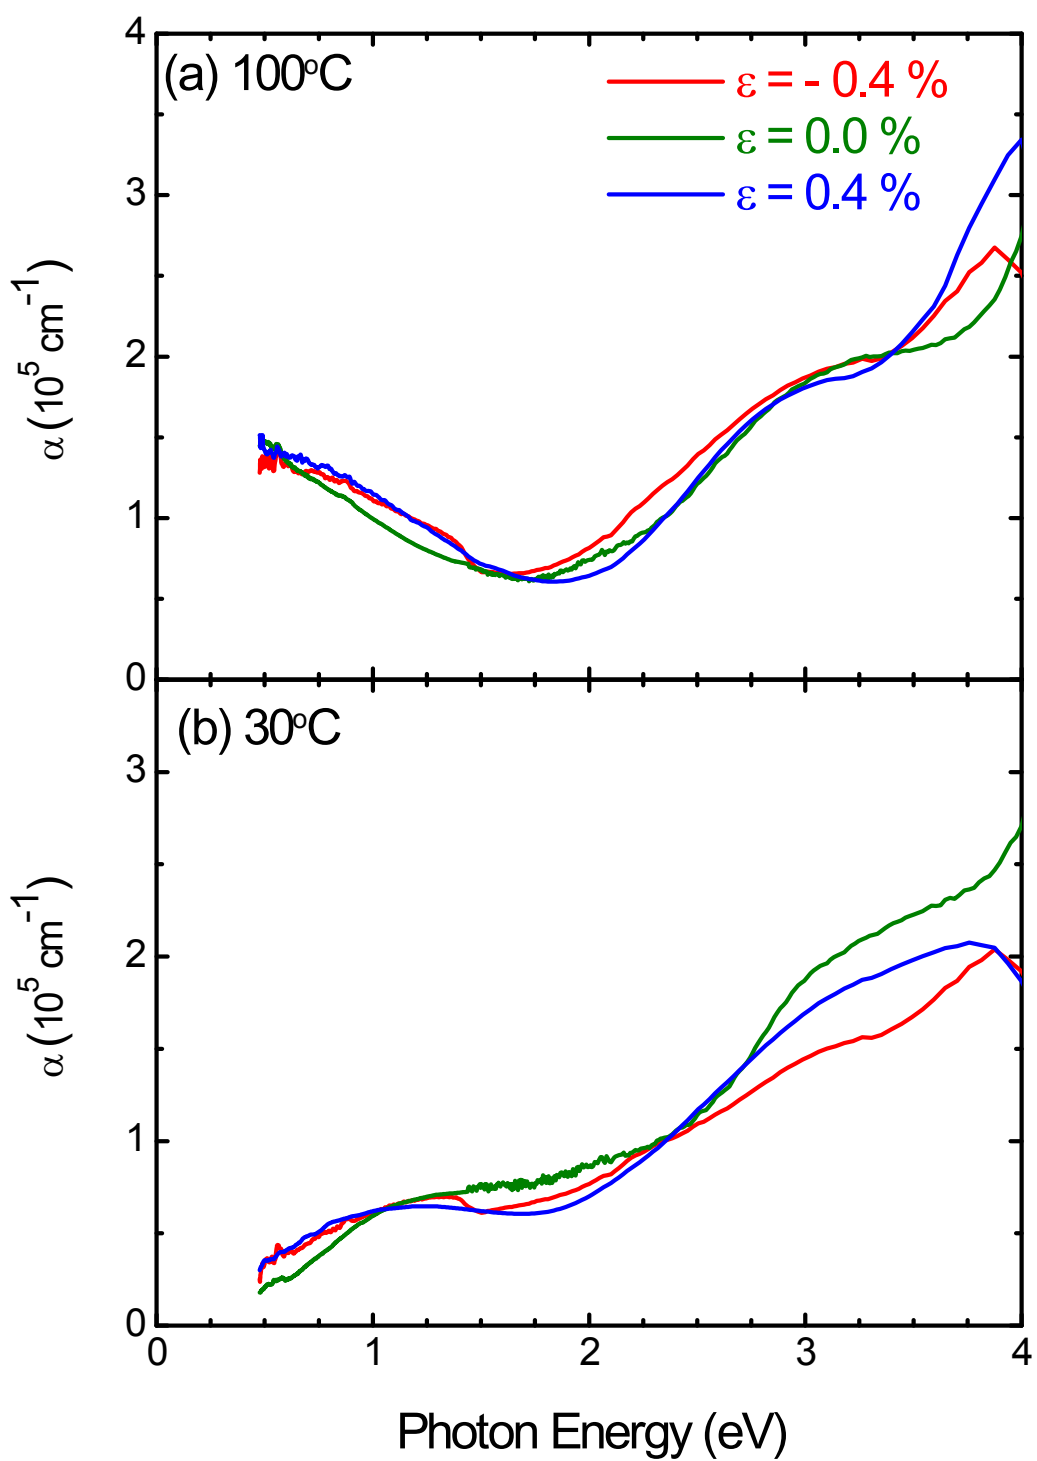

Figure S3 Strain dependence of optical absorption spectra of  $\text{VO}_2$  at (a)  $100^\circ\text{C}$  and (b)  $30^\circ\text{C}$ .

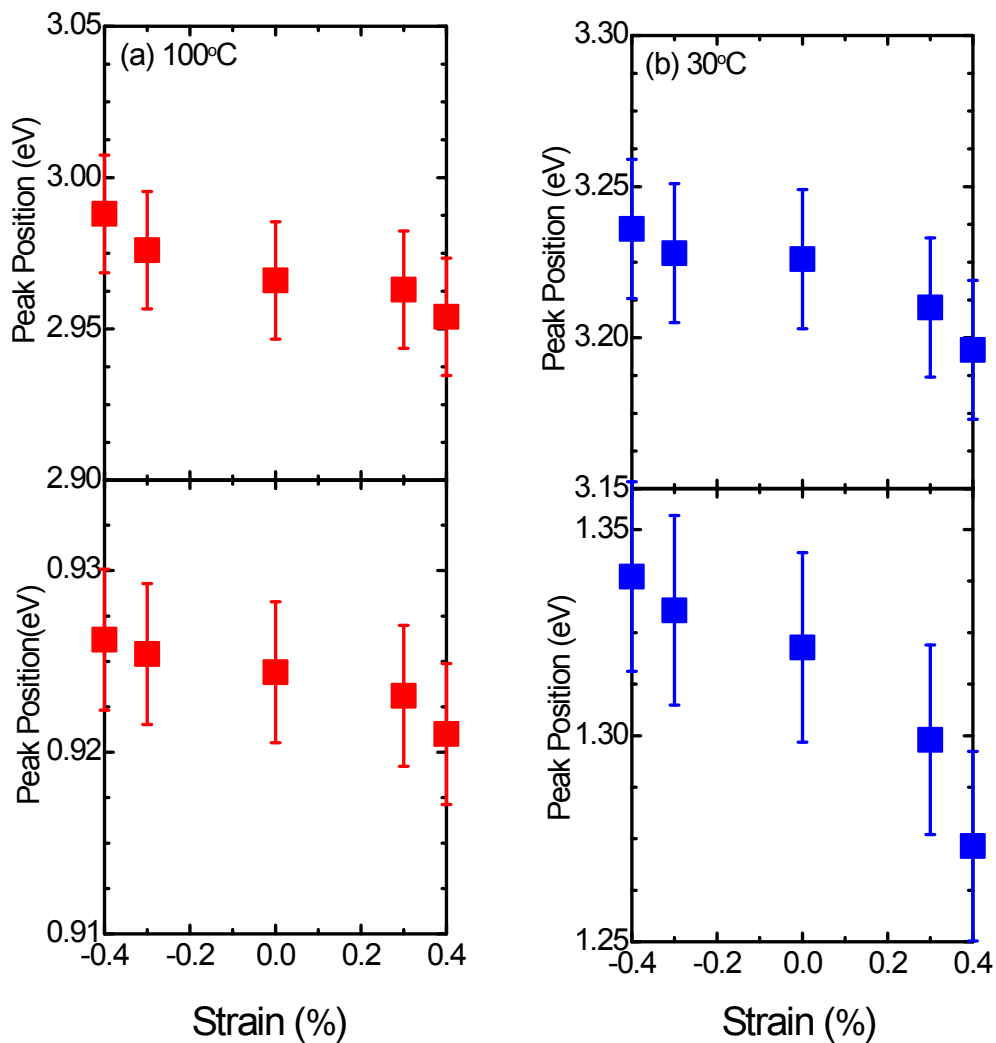

Figure S4 Strain-dependent peak positions of electronic excitations in VO<sub>2</sub> at (a) 100°C and (b) 30°C.
